# Supplementary material for: Multi-Omics reveals SPP1+ Malignant and CXCR4+ TAM crosstalk predicts immunotherapy response in lung adenocarcinoma cancer
Source: Research Square preprint supplement (doi:10.21203/rs.3.rs-7400400/v1), 2025-09-30
Supplement: Supplementary file 1 [file a5902b6e29dc5602db39a149.docx]

Supplementary Figure

**Supplementary Fig. 1 Characterization and Trajectory Analysis of Myeloid Cell Subpopulations in LUAD.**

**(A)** Pseudotime trajectory plot depicting myeloid cell differentiation trajectories.

**(B)** Pseudotime trajectory plot showing trajectory variations among myeloid subtypes in tumor tissues.
